# Supplementary material for: Gearing effects of the patella (knee extensor muscle sesamoid) of the helmeted guineafowl during terrestrial locomotion
Source: PubMed Central journal article supplement (PMC5697681; doi:10.1111/jzo.12485), 2017-07-19

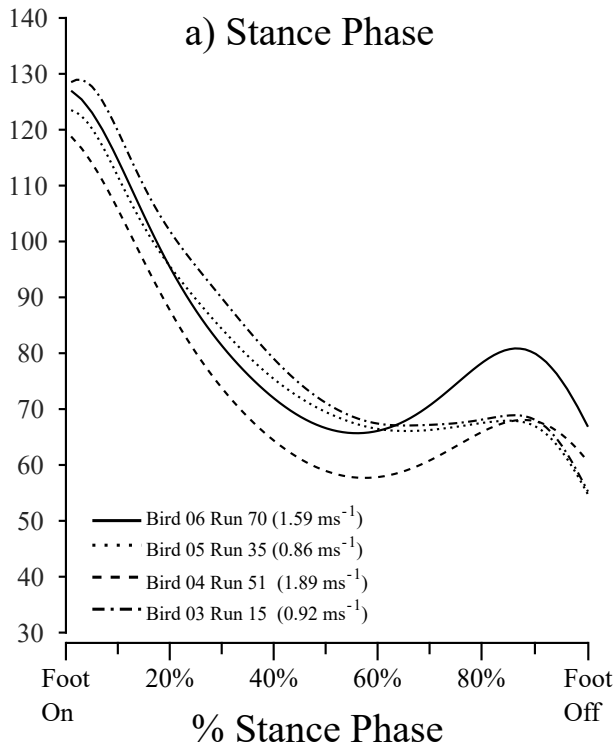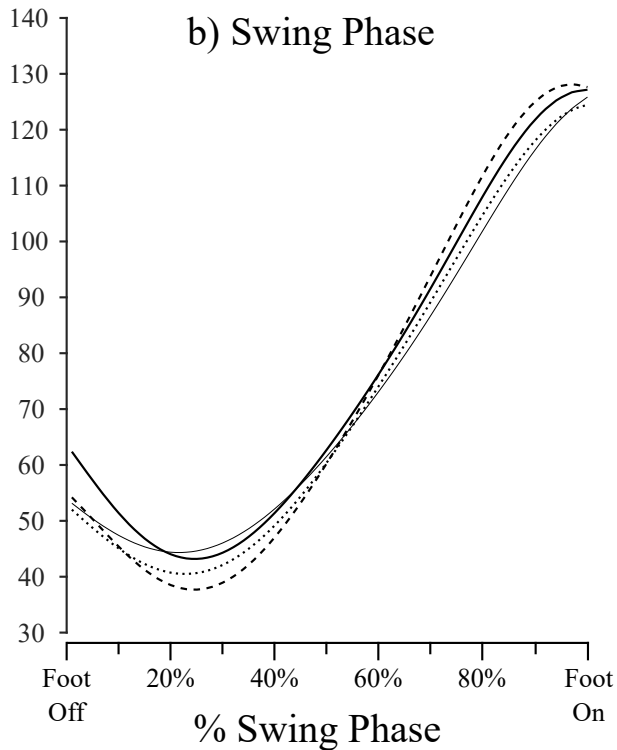

Supplement: JZO-303-178-s001.pdf [file JZO-303-178-s001.pdf]
